# Supplementary material
Source: HighWire-hosted journal article supplement (https://nutrition.bmj.com/content/bmjnph-2022-000562)

[Supplement 2: Distribution of fruit and vegetable consumption](#)**Supplementary Figure 1: Heterogeneity in change (during lockdown versus after/before) in mental wellbeing (SWEMWBS)**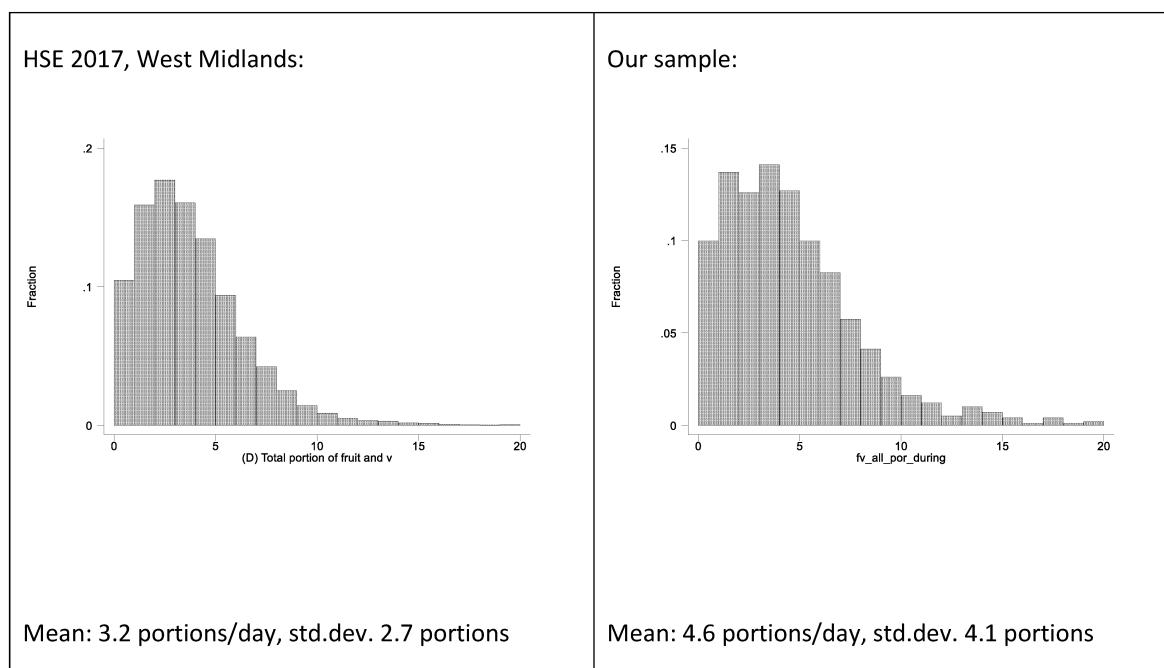

Supplement: inline-supplementary-material-2 [file inline-supplementary-material-2.pdf]
