# Supplementary material
Source: HighWire-hosted journal article supplement (https://nutrition.bmj.com/content/bmjnph-2022-000562)
Supplement: inline-supplementary-material-3 [file inline-supplementary-material-3.pdf]

[Supplement 3: Heterogeneity in mental wellbeing](#)

**Supplementary Figure 2: Heterogeneity in change (during lockdown versus after/before) in mental wellbeing (SWEMWBS)**

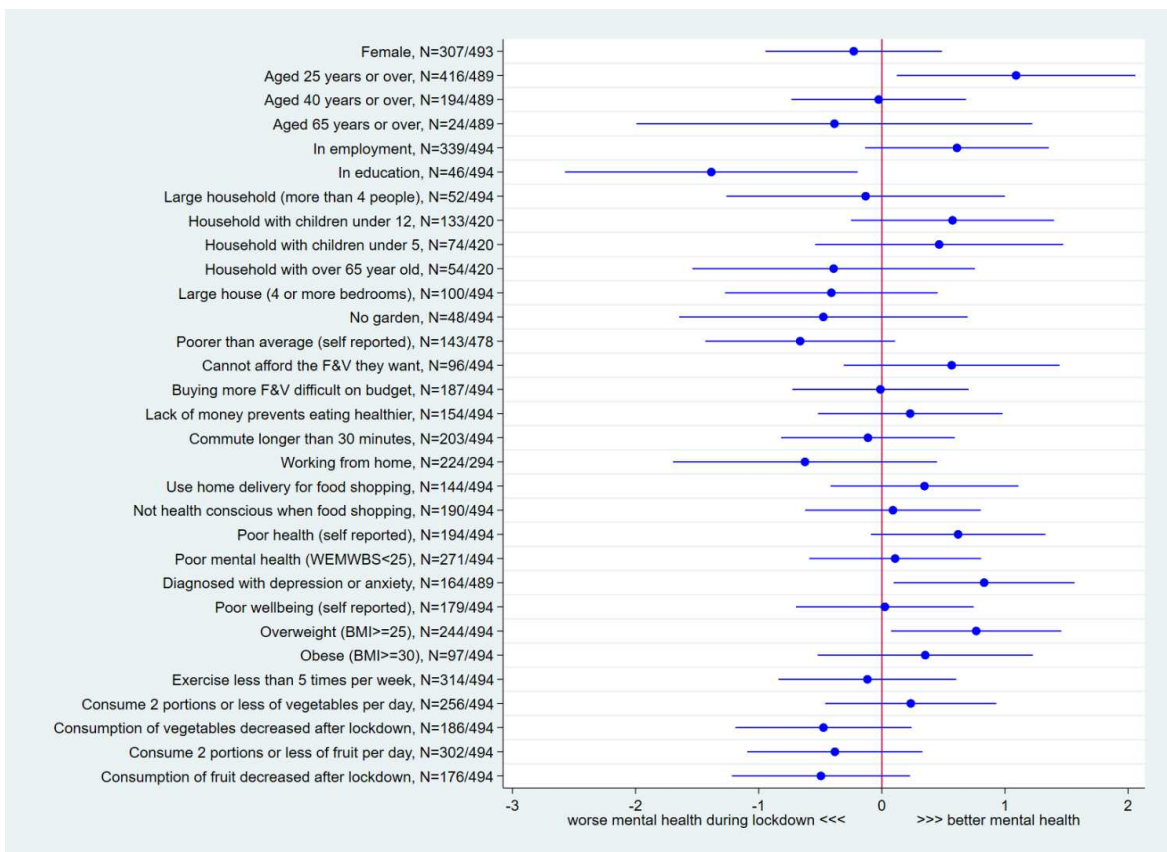

Figure shows point estimates and 95% confidence intervals
